# Supplementary material
Source: publisher site journal article supplement (https://www.dovepress.com/article/453608)
Supplement: Supplementary file 1 [file get_supplementary_file.php]

**Supporting information**


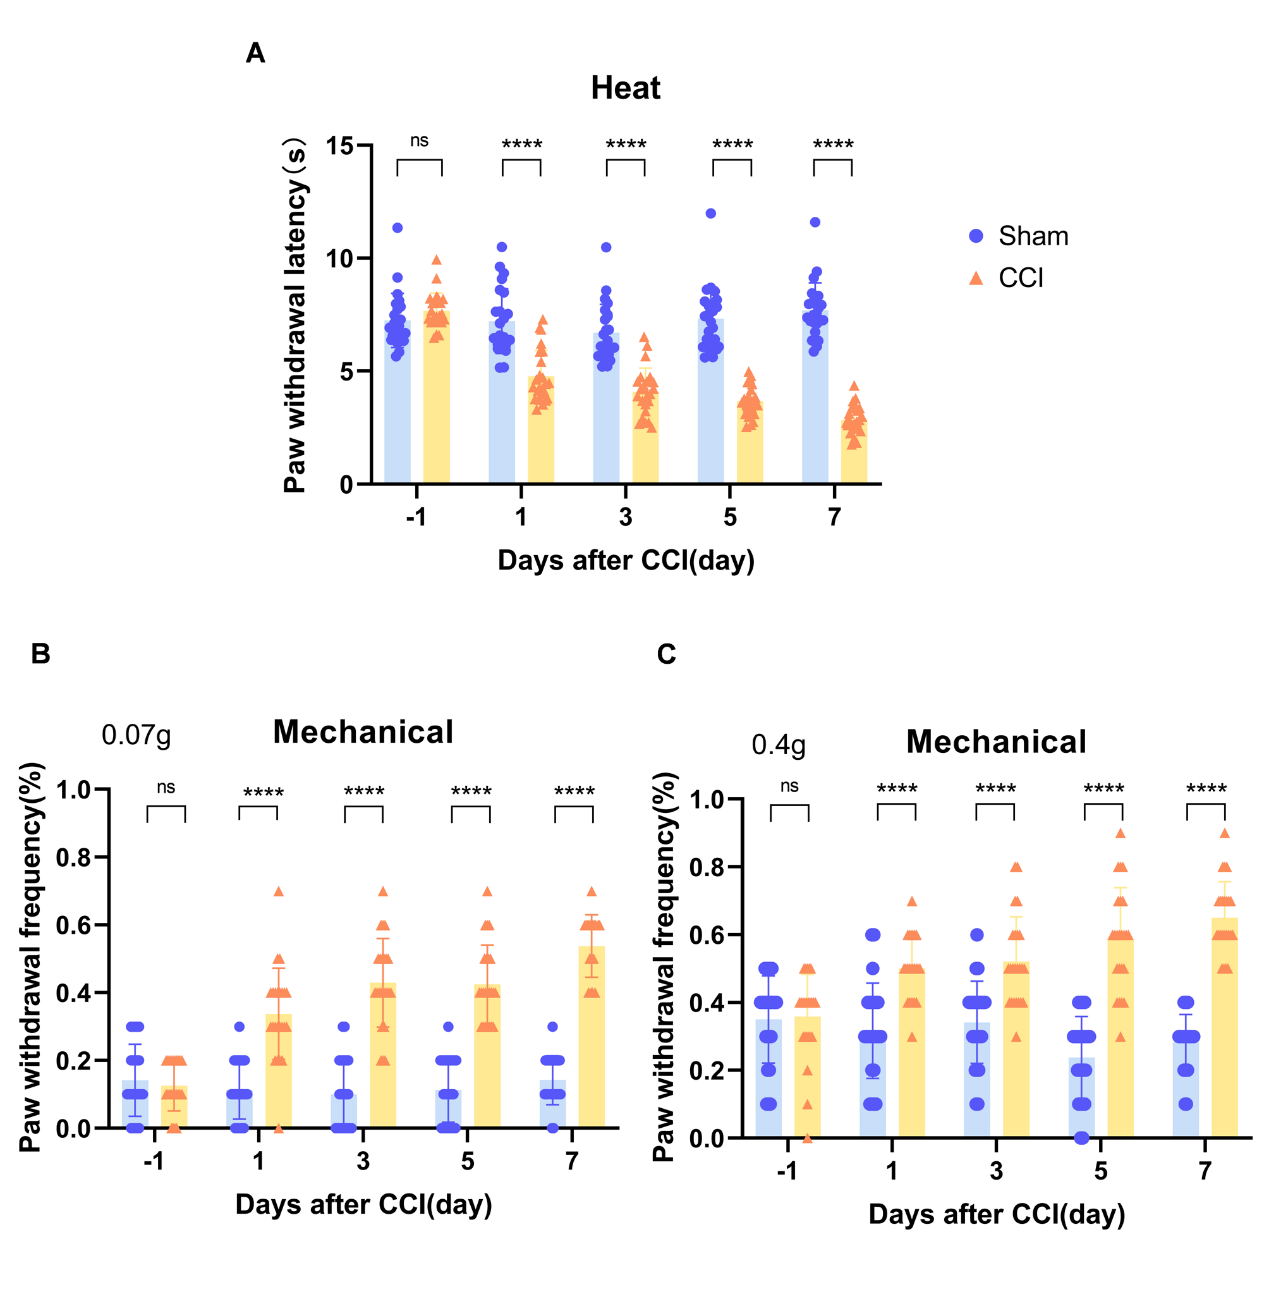


**Figure S1.** Behavioral tests were examined one day before CCI/sham surgery and on day 1, 3, 5 and 7 after CCI/sham surgery. (A) Paw withdrawal latencies to heat and paw withdrawal frequencies to (B) 0.07g and (C) 0.4 g von Frey filaments were examined for baseline. After CCI surgery, paw withdrawal latencies to heat significantly reduced and paw withdrawal frequency to mechanical significantly increased. (n=24 mice per group, ns means no statistical significant difference, **** *p* < 0.0001)
